# Supplementary material for: Islet Stellate Cells Isolated from Fibrotic Islet of Goto-Kakizaki Rats Affect Biological Behavior of Beta-Cell
Source: Hindawi journal article supplement (doi:10.1155/2016/6924593), 2015-12-01
Supplement: f1 [file 6924593.f1.pdf]

Supplementary table 1. Differential expression genes between ISCs and PSCs

| ISCs (P3) vs. PSCs (P3) |          | ISCs (P3) vs. PSCs (P3) |          | ISCs (P3) vs. PSCs (P3) |          |
|-------------------------|----------|-------------------------|----------|-------------------------|----------|
| Symbol                  | Fold of  | Symbol                  | Fold of  | Symbol                  | Fold of  |
| <i>Serpina12</i>        | 12.81278 | <i>Asb2</i>             | -10.9084 | <i>Reps1</i>            | -3.09692 |
| <i>Cd180</i>            | 12.55603 | <i>Shox2</i>            | -10.4105 | <i>Fxr1</i>             | -3.05802 |
| <i>Lhx8</i>             | 11.58026 | <i>Bhlhe22</i>          | -10.2981 | <i>Gpm6b</i>            | -3.03123 |
| <i>Fam180a</i>          | 10.39232 | <i>Tnfrsf21</i>         | -10.218  | <i>Olfm1</i>            | -3.02828 |
| <i>Igfbp2</i>           | 10.37395 | <i>Clec14a</i>          | -10.218  | <i>Ddah2</i>            | -3.01969 |
| <i>Abhd16a</i>          | 10.25857 | <i>RGD1306576</i>       | -10.1111 | <i>Kif5c</i>            | -3.00088 |
| <i>Atp2a1</i>           | 10.21796 | <i>Ifitm1</i>           | -10.0888 | <i>Thy1</i>             | -2.99609 |
| <i>Cmklr1</i>           | 9.296916 | <i>Fxyd6</i>            | -9.97154 | <i>Serinc3</i>          | -2.99563 |
| <i>Mgll</i>             | 9.257388 | <i>Nefn</i>             | -9.94691 | <i>Cyp4b1</i>           | -2.97143 |
| <i>Cfb</i>              | 9.257388 | <i>Dcdc2</i>            | -9.94691 | <i>Uap1</i>             | -2.96851 |
| <i>Smoc1</i>            | 9.216746 | <i>Ccl12</i>            | -9.94691 | <i>Itm2a</i>            | -2.96347 |
| <i>Fam111a</i>          | 9.131857 | <i>Hoxb5</i>            | -9.92184 | <i>Sap18</i>            | -2.94067 |
| <i>Il16</i>             | 9.087463 | <i>Arhgdib</i>          | -9.92184 | <i>Nox1</i>             | -2.9386  |
| <i>Ereg</i>             | 8.945444 | <i>LOC24906</i>         | -9.89633 | <i>Crebzf</i>           | -2.9386  |
| <i>Dhrsx</i>            | 8.945444 | <i>Sectm1b</i>          | -9.84392 | <i>Rala</i>             | -2.93695 |
| <i>Orm1</i>             | 8.894818 | <i>Mcam</i>             | -9.81698 | <i>Grem2</i>            | -2.93341 |
| <i>Fcrla</i>            | 8.84235  | <i>Tmem178</i>          | -9.73302 | <i>Ccdc82</i>           | -2.926   |
| <i>Ano1</i>             | 8.787903 | <i>Ggt5</i>             | -9.64386 | <i>Cacna1c</i>          | -2.926   |
| <i>Cdc6</i>             | 8.787903 | <i>Cd40</i>             | -9.54689 | <i>Nrn1</i>             | -2.9176  |
| <i>Tbx1</i>             | 8.731319 | <i>Rtn1</i>             | -9.51373 | <i>Cyld</i>             | -2.88753 |
| <i>Tnn</i>              | 8.672425 | <i>Atp8b1</i>           | -9.44501 | <i>Id2</i>              | -2.88753 |
| <i>Bst2</i>             | 8.611025 | <i>Dchs1</i>            | -9.40939 | <i>Procr</i>            | -2.85065 |
| <i>Lbp</i>              | 8.601734 | <i>Tmem132e</i>         | -9.40939 | <i>Lrrn4cl</i>          | -2.848   |
| <i>Mrpl43</i>           | 8.546894 | <i>RGD1562533</i>       | -9.40939 | <i>Ppp1r14a</i>         | -2.84228 |
| <i>Tiam1</i>            | 8.546894 | <i>Stac2</i>            | -9.33539 | <i>Mfap5</i>            | -2.82818 |
| <i>Lrp2</i>             | 8.47978  | <i>Kras</i>             | -9.33539 | <i>Tspan7</i>           | -2.82216 |
| <i>Cenpf</i>            | 8.409391 | <i>Serpib6b</i>         | -9.33539 | <i>Wfdc1</i>            | -2.81734 |
| <i>Oscpl</i>            | 8.409391 | <i>Nap1l2</i>           | -9.29692 | <i>Lmcd1</i>            | -2.81654 |
| <i>Dagla</i>            | 8.33539  | <i>Slc15a3</i>          | -9.21675 | <i>Dapk2</i>            | -2.80735 |
| <i>Icam4</i>            | 8.257388 | <i>Ptn</i>              | -9.21675 | <i>C1galt1</i>          | -2.80735 |
| <i>Pold1</i>            | 8.257388 | <i>Egflam</i>           | -9.21675 | <i>Adm2</i>             | -2.80735 |
| <i>Adhfe1</i>           | 8.174926 | <i>Aard</i>             | -9.1783  | <i>Ntm</i>              | -2.76637 |
| <i>Vcam1</i>            | 8.051363 | <i>Cd24</i>             | -9.17493 | <i>Peli1</i>            | -2.75646 |
| <i>Nostrin</i>          | 7.994353 | <i>Has2</i>             | -9.13186 | <i>Ccdc127</i>          | -2.75489 |
| <i>Iqgap3</i>           | 7.994353 | <i>Nog</i>              | -9.08746 | <i>Miip</i>             | -2.75489 |
| <i>Aass</i>             | 7.894818 | <i>Akap5</i>            | -9.04166 | <i>Echdc2</i>           | -2.75489 |
| <i>Repin1</i>           | 7.894818 | <i>RGD1304810</i>       | -8.94544 | <i>Rsrc1</i>            | -2.74577 |
| <i>Aldh3a1</i>          | 7.894818 | <i>Ptafr</i>            | -8.89482 | <i>Acyp2</i>            | -2.74543 |
| <i>Dmrta1</i>           | 7.894818 | <i>Ankrd13d</i>         | -8.89482 | <i>Anxa3</i>            | -2.74428 |
| <i>Prss12</i>           | 7.894818 | <i>Mat1a</i>            | -8.89482 | <i>Cnih2</i>            | -2.74348 |

|                     |          |                   |          |                   |          |
|---------------------|----------|-------------------|----------|-------------------|----------|
| <i>Mcm5</i>         | 7.894818 | <i>4-Sep</i>      | -8.89482 | <i>Rora</i>       | -2.73697 |
| <i>F2rl2</i>        | 7.787903 | <i>Rcsd1</i>      | -8.89482 | <i>Fam35a</i>     | -2.73697 |
| <i>Ccnb2</i>        | 7.787903 | <i>Tmem126a</i>   | -8.84235 | <i>RGD1309676</i> | -2.68952 |
| <i>Tuft1</i>        | 7.672425 | <i>A2m</i>        | -8.84235 | <i>Serinc2</i>    | -2.68237 |
| <i>Clcnka</i>       | 7.672425 | <i>Bves</i>       | -8.84235 | <i>Man1a2</i>     | -2.67807 |
| <i>Zbtb25</i>       | 7.672425 | <i>Fam19a5</i>    | -8.7879  | <i>Bnip3</i>      | -2.65295 |
| <i>C4bpa</i>        | 7.672425 | <i>Hspa12b</i>    | -8.7879  | <i>Yy1</i>        | -2.65208 |
| <i>LOC100360880</i> | 7.672425 | <i>RGD1311186</i> | -8.73132 | <i>Spry4</i>      | -2.65208 |
| <i>Col14a1</i>      | 6.311922 | <i>RGD1565947</i> | -8.73132 | <i>Mmd</i>        | -2.64989 |
| <i>Leprel2</i>      | 6.262924 | <i>Mst1</i>       | -8.67243 | <i>Hand2</i>      | -2.64855 |
| <i>Adamtsl3</i>     | 6.17424  | <i>Amigo2</i>     | -8.67243 | <i>C2cd2l</i>     | -2.64386 |
| <i>Expi</i>         | 6.050751 | <i>Atf3</i>       | -8.61102 | <i>Exoc5</i>      | -2.63894 |
| <i>Meox2</i>        | 5.443919 | <i>Chrm2</i>      | -8.61102 | <i>Tspan2</i>     | -2.63819 |
| <i>Tti2</i>         | 5.393327 | <i>Crabp1</i>     | -8.61102 | <i>Pla1a</i>      | -2.62749 |
| <i>Osr1</i>         | 5.38184  | <i>LOC682105</i>  | -8.54689 | <i>RT1-CE1</i>    | -2.62449 |
| <i>Serpina3n</i>    | 4.979057 | <i>Fgf10</i>      | -8.54689 | <i>Ndrp2</i>      | -2.61914 |
| <i>Asb12</i>        | 4.875433 | <i>Art3</i>       | -8.54689 | <i>Lztf1l</i>     | -2.61891 |
| <i>Clu</i>          | 4.831837 | <i>Angptl2</i>    | -8.47978 | <i>Ptp4a3</i>     | -2.61891 |
| <i>Rhpn2</i>        | 4.782902 | <i>Trim29</i>     | -8.47978 | <i>Strbp</i>      | -2.61644 |
| <i>Fibin</i>        | 4.615576 | <i>Ppm1k</i>      | -8.47978 | <i>Lpl</i>        | -2.60622 |
| <i>Calml4</i>       | 4.491853 | <i>Nat8l</i>      | -8.47978 | <i>Idi1</i>       | -2.60184 |
| <i>Mycn</i>         | 4.426265 | <i>Camp</i>       | -8.47978 | <i>Glipr1</i>     | -2.59661 |
| <i>Mtss1</i>        | 4.403774 | <i>Ednrb</i>      | -8.47978 | <i>Adam19</i>     | -2.57831 |
| <i>Scara5</i>       | 4.396417 | <i>Mboat2</i>     | -8.40939 | <i>Brp44</i>      | -2.56487 |
| <i>Cdt1</i>         | 4.357552 | <i>Ebf3</i>       | -8.40939 | <i>Arhgap18</i>   | -2.5486  |
| <i>Efna1</i>        | 4.247928 | <i>Map4k1</i>     | -8.40939 | <i>Mettl10</i>    | -2.54553 |
| <i>Serpine2</i>     | 4.241212 | <i>Mpzl2</i>      | -8.33539 | <i>Dapk1</i>      | -2.54432 |
| <i>Gpr88</i>        | 4.203991 | <i>Cxcl2</i>      | -8.33381 | <i>Gal3st4</i>    | -2.53752 |
| <i>Sulf2</i>        | 4.201614 | <i>Rbm46</i>      | -8.25739 | <i>Tnfrsf9</i>    | -2.52356 |
| <i>Cth</i>          | 4.197939 | <i>Slc29a4</i>    | -8.25739 | <i>Cenpj</i>      | -2.52356 |
| <i>Akr1c13</i>      | 4.129889 | <i>Myl1</i>       | -8.25739 | <i>Gadd45g</i>    | -2.51604 |
| <i>Fbn1</i>         | 4.075849 | <i>Tc2n</i>       | -8.25739 | <i>Asb3</i>       | -2.50416 |
| <i>Flvcr2</i>       | 4        | <i>Avp</i>        | -8.17493 | <i>Trim16</i>     | -2.50416 |
| <i>Slc7a2</i>       | 3.908022 | <i>Cpne4</i>      | -8.17493 | <i>Rtn2</i>       | -2.50321 |
| <i>Tst</i>          | 3.893901 | <i>MGC95152</i>   | -8.17493 | <i>RGD1308019</i> | -2.5025  |
| <i>Ptpn14</i>       | 3.859443 | <i>Itgb1bp2</i>   | -8.17493 | <i>Ccl5</i>       | -2.48694 |
| <i>Bmp4</i>         | 3.840426 | <i>Rbm24</i>      | -8.08746 | <i>Ctxn1</i>      | -2.48618 |
| <i>Dmrt2</i>        | 3.839804 | <i>Bfsp1</i>      | -8.08746 | <i>Adcy5</i>      | -2.48239 |
| <i>Ubac2</i>        | 3.829014 | <i>Msi1</i>       | -8.08746 | <i>Ankrd1</i>     | -2.47913 |
| <i>Akr1cl</i>       | 3.662965 | <i>Sh2d2a</i>     | -8.08746 | <i>Sgk1</i>       | -2.47568 |
| <i>Anxa8</i>        | 3.615864 | <i>Tasp1</i>      | -8.08746 | <i>Plekho1</i>    | -2.472   |
| <i>Car9</i>         | 3.61177  | <i>Sncg</i>       | -8.08746 | <i>Exoc8</i>      | -2.45943 |
| <i>Eln</i>          | 3.584963 | <i>Nppb</i>       | -8.08746 | <i>Srp9</i>       | -2.45672 |
| <i>Srgn</i>         | 3.571181 | <i>Tnnt1</i>      | -8.08746 | <i>Hbs1l</i>      | -2.4548  |

|                  |          |                   |          |                   |          |
|------------------|----------|-------------------|----------|-------------------|----------|
| <i>Cacna1g</i>   | 3.537515 | <i>Egfl6</i>      | -8.08746 | <i>Me1</i>        | -2.45404 |
| <i>Cpxm2</i>     | 3.507031 | <i>Mpp5</i>       | -8.08746 | <i>Entpd5</i>     | -2.44887 |
| <i>Alg3</i>      | 3.486941 | <i>Acta1</i>      | -7.99435 | <i>Heca</i>       | -2.44057 |
| <i>Egr2</i>      | 3.459432 | <i>Col4a3</i>     | -7.99435 | <i>Acsl3</i>      | -2.43453 |
| <i>Kbtbd10</i>   | 3.459432 | <i>Adcy4</i>      | -7.99435 | <i>Traf4</i>      | -2.43296 |
| <i>Plscr2</i>    | 3.432173 | <i>Wnt5a</i>      | -7.99435 | <i>Grm2</i>       | -2.43296 |
| <i>Cobl</i>      | 3.407821 | <i>Ckmt2</i>      | -7.99435 | <i>RGD1563888</i> | -2.43296 |
| <i>Hoxa9</i>     | 3.392317 | <i>Tnni3</i>      | -7.99435 | <i>Slc3a1</i>     | -2.43296 |
| <i>Fbln1</i>     | 3.392317 | <i>Slc30a4</i>    | -7.89482 | <i>Cdh11</i>      | -2.43229 |
| <i>Cox6a2</i>    | 3.374203 | <i>Tspan11</i>    | -7.89482 | <i>Spats2l</i>    | -2.42465 |
| <i>Fmod</i>      | 3.373272 | <i>Dcaf12l1</i>   | -7.89482 | <i>Cyp7b1</i>     | -2.4196  |
| <i>Rassf4</i>    | 3.33571  | <i>Rgs7</i>       | -7.89482 | <i>Ehbp1l1</i>    | -2.41801 |
| <i>Il1f10</i>    | 3.326737 | <i>Rims2</i>      | -7.7879  | <i>Il1r2</i>      | -2.41636 |
| <i>Tk1</i>       | 3.322635 | <i>Hoga1</i>      | -7.7879  | <i>Gbp5</i>       | -2.41504 |
| <i>LOC303448</i> | 3.321928 | <i>Rhbdl3</i>     | -7.7879  | <i>Depdc5</i>     | -2.4021  |
| <i>Gas7</i>      | 3.296858 | <i>Car6</i>       | -7.7879  | <i>Tbc1d25</i>    | -2.39232 |
| <i>Solh</i>      | 3.273018 | <i>Pitx2</i>      | -7.7879  | <i>Tpm1</i>       | -2.38774 |
| <i>Atp10a</i>    | 3.262306 | <i>Actn2</i>      | -7.7879  | <i>Arhgap28</i>   | -2.37851 |
| <i>Kif20a</i>    | 3.249044 | <i>Stag1</i>      | -7.67243 | <i>Cd53</i>       | -2.37851 |
| <i>Fndc1</i>     | 3.247928 | <i>Akr1c3</i>     | -7.67243 | <i>RGD1564927</i> | -2.36923 |
| <i>Pcsk1n</i>    | 3.233563 | <i>RGD1563349</i> | -7.67243 | <i>Igfbp3</i>     | -2.36784 |
| <i>Rftn1</i>     | 3.221848 | <i>Sec31a</i>     | -7.67243 | <i>Sft2d1</i>     | -2.35755 |
| <i>Ccna2</i>     | 3.169925 | <i>Actg2</i>      | -7.67243 | <i>Ndrgr1</i>     | -2.35755 |
| <i>Fbxo5</i>     | 3.169925 | <i>Slc5a7</i>     | -7.67243 | <i>Lphn1</i>      | -2.35646 |
| <i>Fzd6</i>      | 3.130495 | <i>Notch4</i>     | -7.67243 | <i>Tnfaip6</i>    | -2.3559  |
| <i>Atf6</i>      | 3.129283 | <i>Cxcl14</i>     | -7.67243 | <i>Taf1</i>       | -2.35364 |
| <i>LOC691670</i> | 3.129283 | <i>Odf1</i>       | -7.67243 | <i>Serpib9</i>    | -2.35151 |
| <i>Klf5</i>      | 3.129283 | <i>Cd209d</i>     | -7.67243 | <i>Colec12</i>    | -2.34647 |
| <i>Aox1</i>      | 3.060025 | <i>Mmp12</i>      | -7.67243 | <i>Serinc5</i>    | -2.33792 |
| <i>Ube2c</i>     | 3.058894 | <i>Reep1</i>      | -7.67243 | <i>Pla2g16</i>    | -2.33165 |
| <i>Grb14</i>     | 3.055656 | <i>Spink2</i>     | -7.67243 | <i>Cdo1</i>       | -2.32997 |
| <i>Hip1r</i>     | 3.054133 | <i>Myl9</i>       | -7.46277 | <i>Nlrp3</i>      | -2.32299 |
| <i>Tgfa</i>      | 3.052164 | <i>Myh11</i>      | -7.38031 | <i>C2</i>         | -2.3229  |
| <i>Selenbp1</i>  | 3.022316 | <i>Mmp3</i>       | -6.69367 | <i>Trmt13</i>     | -2.32193 |
| <i>Mcm4</i>      | 3.00101  | <i>Ier3</i>       | -6.64888 | <i>Gng8</i>       | -2.3156  |
| <i>Fam20c</i>    | 3.000096 | <i>Mylk</i>       | -6.53904 | <i>Cd248</i>      | -2.30793 |
| <i>Steap3</i>    | 2.970228 | <i>Pcp4</i>       | -6.34977 | <i>Spin1</i>      | -2.30485 |
| <i>Itpr3</i>     | 2.963346 | <i>Rarres1</i>    | -6.26789 | <i>Herc4</i>      | -2.29703 |
| <i>Sipa1l1</i>   | 2.934461 | <i>Pdlim3</i>     | -6.20896 | <i>LOC691921</i>  | -2.29624 |
| <i>Tspan18</i>   | 2.928726 | <i>Ndufb6</i>     | -6.14692 | <i>Tagln</i>      | -2.29534 |
| <i>Ccnb1</i>     | 2.925999 | <i>Csf3</i>       | -6.12819 | <i>Gpx3</i>       | -2.29229 |
| <i>Lnx1</i>      | 2.923764 | <i>Ptges</i>      | -6.06701 | <i>Aoc3</i>       | -2.29126 |
| <i>Gpnmb</i>     | 2.903272 | <i>Serpib1a</i>   | -6.01425 | <i>Hapln3</i>     | -2.28951 |
| <i>Siglec10</i>  | 2.888442 | <i>Il11</i>       | -5.8897  | <i>Osgepl1</i>    | -2.28951 |

|                   |          |                |          |                   |          |
|-------------------|----------|----------------|----------|-------------------|----------|
| <i>Icam1</i>      | 2.875886 | <i>Rem1</i>    | -5.81454 | <i>Scoc</i>       | -2.28655 |
| <i>Cdk6</i>       | 2.847362 | <i>Il33</i>    | -5.748   | <i>Ahi1</i>       | -2.2854  |
| <i>Gjb2</i>       | 2.829014 | <i>Cnn1</i>    | -5.67827 | <i>Rbm18</i>      | -2.27886 |
| <i>LOC360228</i>  | 2.813216 | <i>Csrp2</i>   | -5.59582 | <i>Brd2</i>       | -2.27634 |
| <i>Ttc7</i>       | 2.809776 | <i>Lcp1</i>    | -5.58614 | <i>Ahsp</i>       | -2.26303 |
| <i>Chaf1b</i>     | 2.807355 | <i>Spink8</i>  | -5.54007 | <i>Tspan12</i>    | -2.25444 |
| <i>Timp3</i>      | 2.807355 | <i>S100a5</i>  | -5.24882 | <i>Cd59</i>       | -2.24601 |
| <i>Hlx</i>        | 2.792951 | <i>Tpm2</i>    | -5.14562 | <i>Sclt1</i>      | -2.23704 |
| <i>Slc29a1</i>    | 2.762366 | <i>Aldh1a2</i> | -5.11629 | <i>Enpp2</i>      | -2.23386 |
| <i>Dmrta2</i>     | 2.722466 | <i>Cxcl5</i>   | -5.10934 | <i>Dgcr6</i>      | -2.23282 |
| <i>Asf1b</i>      | 2.70044  | <i>Dcn</i>     | -5.03872 | <i>Sumf2</i>      | -2.21946 |
| <i>Uap111</i>     | 2.680653 | <i>Galnt14</i> | -4.97863 | <i>Mettl9</i>     | -2.21719 |
| <i>Ptgis</i>      | 2.667349 | <i>Vwa1</i>    | -4.91514 | <i>Plk4</i>       | -2.21466 |
| <i>Nmnat3</i>     | 2.664453 | <i>Il1b</i>    | -4.88336 | <i>Crem</i>       | -2.21266 |
| <i>Cd200</i>      | 2.656479 | <i>Il17b</i>   | -4.80887 | <i>Ube2m</i>      | -2.20766 |
| <i>Psat1</i>      | 2.655576 | <i>Slc16a3</i> | -4.70411 | <i>Bbx</i>        | -2.19265 |
| <i>Trim24</i>     | 2.651005 | <i>Ebf1</i>    | -4.68732 | <i>Il13ra2</i>    | -2.19265 |
| <i>Pknytl</i>     | 2.643856 | <i>Mgst3</i>   | -4.62128 | <i>Hmgn5</i>      | -2.18612 |
| <i>Tjp2</i>       | 2.624544 | <i>Ccl20</i>   | -4.5102  | <i>Ndn</i>        | -2.1763  |
| <i>C1s</i>        | 2.620988 | <i>Spry1</i>   | -4.49813 | <i>Mfap4</i>      | -2.17463 |
| <i>Slc1a3</i>     | 2.619568 | <i>C1qtmf7</i> | -4.49248 | <i>LOC683788</i>  | -2.16074 |
| <i>Trim37</i>     | 2.584963 | <i>Hspb7</i>   | -4.46347 | <i>Nudcd2</i>     | -2.15094 |
| <i>Zbtb7c</i>     | 2.584963 | <i>Dhrs3</i>   | -4.35859 | <i>LOC682999</i>  | -2.14708 |
| <i>Mcm2</i>       | 2.545129 | <i>Fgf2</i>    | -4.32193 | <i>Scly</i>       | -2.14684 |
| <i>Ubc</i>        | 2.543515 | <i>Pla2g7</i>  | -4.27935 | <i>Ccdc72</i>     | -2.13644 |
| <i>Abcb1a</i>     | 2.537028 | <i>Tmem88</i>  | -4.24793 | <i>Cald1</i>      | -2.13531 |
| <i>Sgcg</i>       | 2.528958 | <i>Bmp2</i>    | -4.22391 | <i>Bmper</i>      | -2.13024 |
| <i>Me3</i>        | 2.523562 | <i>Tubb3</i>   | -4.1907  | <i>Zfp386</i>     | -2.1273  |
| <i>RGD1565469</i> | 2.523562 | <i>Pla2g4a</i> | -4.16579 | <i>Imp3</i>       | -2.12314 |
| <i>Lcn2</i>       | 2.504944 | <i>Lmod1</i>   | -4.16012 | <i>Jkamp</i>      | -2.11548 |
| <i>MGC105649</i>  | 2.501055 | <i>Plk3</i>    | -4.12199 | <i>Larp1b</i>     | -2.10812 |
| <i>Haus4</i>      | 2.475627 | <i>Ptk7</i>    | -4.09201 | <i>Lrrfip2</i>    | -2.0984  |
| <i>Glis2</i>      | 2.473252 | <i>Bace2</i>   | -4.08746 | <i>Lamc2</i>      | -2.09796 |
| <i>Agtr1a</i>     | 2.465982 | <i>Itga8</i>   | -4.08121 | <i>Tmem123</i>    | -2.09727 |
| <i>C3</i>         | 2.438444 | <i>Nexn</i>    | -4.0493  | <i>Prss35</i>     | -2.09443 |
| <i>Sema5a</i>     | 2.424649 | <i>Prl8a9</i>  | -4.04439 | <i>RGD1563982</i> | -2.08246 |
| <i>Ces5a</i>      | 2.42393  | <i>Senp8</i>   | -4.04439 | <i>Chst10</i>     | -2.07506 |
| <i>Ptpn21</i>     | 2.4087   | <i>Micalcl</i> | -4       | <i>Figf</i>       | -2.07039 |
| <i>Hp</i>         | 2.407871 | <i>Ckb</i>     | -3.99382 | <i>Rnf168</i>     | -2.06413 |
| <i>Enpp3</i>      | 2.406793 | <i>Cotl1</i>   | -3.98411 | <i>Ift20</i>      | -2.05526 |
| <i>Zfp608</i>     | 2.402098 | <i>Mipep</i>   | -3.9542  | <i>Tes</i>        | -2.05398 |
| <i>Nov</i>        | 2.40012  | <i>Tp53i11</i> | -3.91663 | <i>Sipa1l2</i>    | -2.05209 |
| <i>RGD1309079</i> | 2.385645 | <i>Tbc1d9</i>  | -3.90689 | <i>Uaca</i>       | -2.05136 |
| <i>Tap2</i>       | 2.377914 | <i>Pde2a</i>   | -3.8929  | <i>Gfpt2</i>      | -2.04543 |

|                     |          |                 |          |                  |          |
|---------------------|----------|-----------------|----------|------------------|----------|
| <i>Sgsm2</i>        | 2.370146 | <i>Vstm4</i>    | -3.87447 | <i>Taf13</i>     | -2.04525 |
| <i>Spp1</i>         | 2.369376 | <i>Tgm2</i>     | -3.86011 | <i>Creg1</i>     | -2.04439 |
| <i>Lmo2</i>         | 2.36257  | <i>Ctsc</i>     | -3.82901 | <i>Crlf1</i>     | -2.04232 |
| <i>Tgm1</i>         | 2.353637 | <i>Mex3b</i>    | -3.80735 | <i>Bscl2</i>     | -2.03916 |
| <i>Birc5</i>        | 2.35286  | <i>Palmd</i>    | -3.77362 | <i>Ipr1</i>      | -2.03562 |
| <i>Rassf9</i>       | 2.35216  | <i>Lum</i>      | -3.75789 | <i>Klc4</i>      | -2.03126 |
| <i>Grn</i>          | 2.347461 | <i>Ctsz</i>     | -3.73767 | <i>15-Sep</i>    | -2.03086 |
| <i>Phgdh</i>        | 2.334451 | <i>Mcat</i>     | -3.70207 | <i>Cklf</i>      | -2.03061 |
| <i>Wnk4</i>         | 2.323342 | <i>Etv1</i>     | -3.70174 | <i>B3galnt2</i>  | -2.02908 |
| <i>Cdkn2c</i>       | 2.32314  | <i>Shd</i>      | -3.64386 | <i>Sh3bgrl</i>   | -2.02745 |
| <i>Cdc20</i>        | 2.321928 | <i>Cacna2d1</i> | -3.62449 | <i>Tifa</i>      | -2.02702 |
| <i>Eepd1</i>        | 2.321928 | <i>Duox1</i>    | -3.6199  | <i>Rbm7</i>      | -2.02367 |
| <i>Ints7</i>        | 2.321928 | <i>Postn</i>    | -3.60643 | <i>Cdr2</i>      | -2.02283 |
| <i>Oas1f</i>        | 2.321928 | <i>Acta2</i>    | -3.60269 | <i>Kif5b</i>     | -2.02147 |
| <i>Matn4</i>        | 2.321222 | <i>Ptgs2</i>    | -3.58496 | <i>B4galt3</i>   | -2.02106 |
| <i>Prps2</i>        | 2.301784 | <i>Lrrc15</i>   | -3.58496 | <i>Acat1</i>     | -2.01851 |
| <i>Tgfbrap1</i>     | 2.300886 | <i>Hspb6</i>    | -3.55835 | <i>Rp2</i>       | -2.01651 |
| <i>RGD1309437</i>   | 2.293647 | <i>Iscu</i>     | -3.53179 | <i>Pdcd5</i>     | -2.01311 |
| <i>Slc17a9</i>      | 2.28649  | <i>Ppp1r3c</i>  | -3.52418 | <i>Dynlt3</i>    | -2.01224 |
| <i>Flot1</i>        | 2.271018 | <i>Abcg1</i>    | -3.51245 | <i>Ephx1</i>     | -2.00434 |
| <i>Nfib</i>         | 2.264801 | <i>Rpl11</i>    | -3.48867 | <i>Pawr</i>      | -2.00343 |
| <i>St6galnac2</i>   | 2.258142 | <i>Isg15</i>    | -3.46803 | <i>Nt5dc1</i>    | -2.00163 |
| <i>Ext2</i>         | 2.255147 | <i>Plcb4</i>    | -3.46643 | <i>Hspb1</i>     | -2.00132 |
| <i>Colla1</i>       | 2.232254 | <i>Tmem106a</i> | -3.45943 | <i>Plekha5</i>   | -2.00118 |
| <i>Spc25</i>        | 2.222392 | <i>Vash2</i>    | -3.45943 | <i>Lipogenin</i> | -2.00106 |
| <i>Mfsd10</i>       | 2.20847  | <i>G0s2</i>     | -3.43024 | <i>Bola1</i>     | -2.00088 |
| <i>Plekha4</i>      | 2.205159 | <i>Ms4a6b</i>   | -3.39333 | <i>Gstk1</i>     | -2.00066 |
| <i>Fos</i>          | 2.201634 | <i>Pcca</i>     | -3.39232 | <i>Col7a1</i>    | -2       |
| <i>Ube2l3</i>       | 2.194843 | <i>Acp5</i>     | -3.39232 | <i>Crcp</i>      | -2       |
| <i>Foxo4</i>        | 2.19397  | <i>Gucy1b3</i>  | -3.37606 |                  |          |
| <i>Ucp2</i>         | 2.183874 | <i>Ina</i>      | -3.36923 |                  |          |
| <i>Stom</i>         | 2.18195  | <i>Kcnk12</i>   | -3.36923 |                  |          |
| <i>Ccdc80</i>       | 2.179991 | <i>Cxcl13</i>   | -3.35216 |                  |          |
| <i>Plscr1</i>       | 2.171103 | <i>Nos2</i>     | -3.34407 |                  |          |
| <i>Pla2g2e</i>      | 2.169925 | <i>Fam101b</i>  | -3.32293 |                  |          |
| <i>Hmox2-ps1</i>    | 2.161581 | <i>Dnajc7</i>   | -3.32193 |                  |          |
| <i>Dusp10</i>       | 2.157009 | <i>Gstm7</i>    | -3.32193 |                  |          |
| <i>Six1</i>         | 2.150942 | <i>Fez1</i>     | -3.32193 |                  |          |
| <i>Gm2a</i>         | 2.145512 | <i>Nid2</i>     | -3.31137 |                  |          |
| <i>Zfp521</i>       | 2.129283 | <i>Sfrp4</i>    | -3.30371 |                  |          |
| <i>Pnkp</i>         | 2.100949 | <i>Fzd8</i>     | -3.29912 |                  |          |
| <i>LOC100366030</i> | 2.100243 | <i>Sh3kbp1</i>  | -3.2854  |                  |          |
| <i>Illrn</i>        | 2.076764 | <i>Osr2</i>     | -3.27448 |                  |          |
| <i>Rrm2</i>         | 2.071399 | <i>Ms4a7</i>    | -3.27302 |                  |          |

|                 |          |                  |          |
|-----------------|----------|------------------|----------|
| <i>Slit3</i>    | 2.047257 | <i>Cgnl1</i>     | -3.24942 |
| <i>Ror2</i>     | 2.045957 | <i>Acsl6</i>     | -3.24793 |
| <i>Nfatc1</i>   | 2.045679 | <i>Pdpr</i>      | -3.22683 |
| <i>Mcm6</i>     | 2.035245 | <i>Cox4i2</i>    | -3.19834 |
| <i>Mri1</i>     | 2.030536 | <i>Tfpi2</i>     | -3.182   |
| <i>Gpc4</i>     | 2.025253 | <i>Ccl3</i>      | -3.16993 |
| <i>Slc7a1</i>   | 2.023757 | <i>Mb</i>        | -3.16993 |
| <i>Tnfrsf9</i>  | 2.019961 | <i>Nhs</i>       | -3.16993 |
| <i>Man2b2</i>   | 2.013655 | <i>Rarres2</i>   | -3.15423 |
| <i>Comt</i>     | 2.012375 | <i>Hdac11</i>    | -3.12883 |
| <i>Eif4ebp2</i> | 2.000922 | <i>Esm1</i>      | -3.12736 |
| <i>Impa2</i>    | 2        | <i>Phf14</i>     | -3.12477 |
| <i>Neu1</i>     | 2        | <i>MGC116197</i> | -3.0976  |

---
